# Supplementary material
Source: publisher figshare collection journal article supplement (https://gsapubs.figshare.com/ndownloader/files/23301956)
Supplement: Supplementary file 1 [file 23301956]

A modeling case for high atmospheric oxygen concentrations during the Mesozoic and Cenozoic

Mills et al.

1    **APPENDIX**

2    **APPENDIX 1: ALTERATIONS TO PREVIOUSLY PUBLISHED MODEL**

3    **The COPSE and GEOCARB models**

4            The original COPSE model (Bergman et al., 2004) is a long term biogeochemical box  
5    model, based on the GEOCARB models (Berner 1991, 1994, Berner and Kothavala, 2001). It  
6    calculates fluxes between the atmosphere/ocean and sedimentary reservoirs of oxidised and  
7    reduced carbon and sulphur to estimate changes in CO<sub>2</sub>, O<sub>2</sub> and ocean sulphate over the  
8    Phanerozoic. Since publication of COPSE, GEOCARB has been extended to include  
9    calculations for the sulphur cycle and oxygen (GEOCARBSULF). In Mills et al. (2014),  
10   COPSE was updated to consider the weatherable area of different rock types, and to  
11   investigate alternative reconstructions for volcanic degassing rates (Van Der Meer et al.,  
12   2014). The model predictions were compared to variation in seawater <sup>87</sup>Sr/<sup>86</sup>Sr.

13           The critical difference between COPSE and GEOCARBSULF is the method used to  
14   estimate the burial rates of organic carbon and pyrite sulphur, which are the long term sources  
15   of oxygen. COPSE uses integrated cycles of limiting nutrients P and N (following Lenton and  
16   Watson 2000) to estimate these fluxes based on other model parameters, such as nutrient  
17   delivery via weathering. GEOCARBSULF uses an isotope mass balance technique (IMB:  
18   Berner 1987, 2001) which infers the burial rates from known changes in isotope ratios δ<sup>13</sup>C  
19   and δ<sup>34</sup>S, and does not require the calculation of nutrient fluxes. Whist model predictions for  
20   CO<sub>2</sub> over the Phanerozoic are broadly similar, predictions for variation in O<sub>2</sub> are substantially  
21   different.

## 22    **Model used in this work**

23            This paper uses the latest version of the COPSE biogeochemical model (Mills et al.,  
24    2014), and adds to this a routine for calculating the burial rates of organic carbon and pyrite  
25    sulphur via isotope mass balance, mirroring the functionality of the GEOCARBSULF model  
26    (Berner, 2006; 2009). The resulting model is very similar to GEOCARBSULF, but  
27    differences remain in the assumed rate of volcanic degassing, and the weatherable area of  
28    volcanic rocks, as well as more minor quantitative differences in the calculations for  
29    weathering fluxes.

30            In this paper we wish to test the oxygen predictions from the isotope mass balance  
31    system, particularly with regard to the input of  $\delta^{13}\text{C}$  data, which shows large uncertainty. In  
32    theory, this test can be carried out using the GEOCARBSULF model, however recent work  
33    has shown that the computational algorithm used to solve the model fails when  $\delta^{13}\text{C}$  inputs  
34    are varied only slightly from the model baseline (Royer et al., 2014). The COPSE algorithm  
35    uses a variable time-step method and is therefore suited to testing wide differences in input  
36    parameters. Thus we adapt the COPSE model to test the isotope mass balance method by  
37    removing the nutrient system and replacing with the IMB equations. This has the additional  
38    benefit of testing whether the differences in the COPSE formulations for degassing and  
39    weathering have much impact on the model outputs under isotope mass balance.

40    To summarize the results of this exercise:

- 41            • Replacing the nutrient system in COPSE with the exact isotope mass balance  
42            system from GEOCARBSULF (including standard inputs for  $\delta^{13}\text{C}$  and  $\delta^{34}\text{S}$ )  
43            results in oxygen predictions very similar to GEOCARBSULF. Showing that  
44             $\text{O}_2$  predictions are much more dependent on the assumed isotope record than  
45            other model processes.

- Replacing the standard  $\delta^{13}\text{C}$  input compilation with a more recent record (Saltzman and Thomas, 2012) results in major revision of the  $\text{O}_2$  predictions, with  $p\text{O}_2 > 0.2\text{atm}$  for the whole model timeframe (200-0Ma).

## **Rapid recycling**

In order to add the isotope mass balance system to COPSE, the model must be modified to include ‘rapid recycling’ of sedimentary carbon and sulphur. Under this method, it is assumed that geologically young sedimentary rocks constitute the majority of interaction with the surface system, allowing the isotopic signature of buried material to be more quickly recycled to the atmosphere and oceans. This technique has been included in all isotope mass balance approaches (Berner 1987; 2006; 2009; Royer et al., 2014).

The method involves splitting the sedimentary reservoirs for organic carbon, carbonates, pyrite and gypsum sulphur into ‘young’ and ‘ancient’ boxes. The young boxes are smaller and have higher weathering rates, the ancient boxes are much larger and have lower weathering rates (see ms figure 2). The relative size of the young and ancient reservoirs, as well as the relative weathering contributions are taken directly from GEOCARBSULF, and are listed below with the other model parameters. The carbon and sulphur cycle schematic from the attached manuscript, which details the flux names, is reproduced here (A1) for convenience.

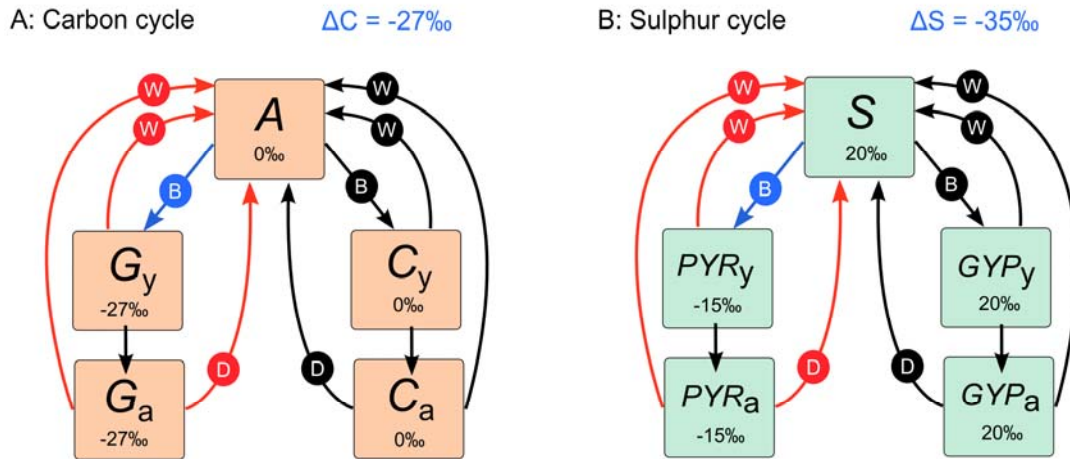

Figure DR1. Long term carbon and sulphur cycles. The carbon cycle consists of fluxes between atmosphere and ocean carbon (A), organic carbon (G) and carbonate (C). The sulphur cycle represents ocean sulphate (S), buried reduced pyrite (PYR) and oxidised gypsum (GYP). Burial (B) moves carbon and sulphur from the atmosphere and ocean to the crustal reservoirs, and it is returned by weathering (W) and degassing/metamorphism (D). Subscript (y) denotes young crustal reservoirs, (a) denotes ancient crustal reservoirs. Oxygen sources are shown in blue, sinks are shown in red. Present day isotope ratios  $\delta^{13}\text{C}$  and  $\delta^{34}\text{S}$  are shown for carbon and sulphur reservoirs respectively in per mil (‰),  $\Delta\text{C}$  and  $\Delta\text{S}$  show the burial fractionation effects for carbon and sulphur respectively.

### Isotope mass balance equations for burial fluxes

With rapid recycling added to the COPSE model, and the nutrient system removed completely, the equations representing organic carbon burial and pyrite sulphur burial are copied exactly from GEOCARBSULF, the code for which was kindly sent by R. A. Berner. The mathematical derivation is published in Berner (1987) and begins with the assumption of input-output parity for  $^{12}\text{C}$  and  $^{13}\text{C}$  atoms (and  $^{34}\text{S}$  and  $^{32}\text{S}$  for sulphur). For Carbon:

$$Input \times \delta(Input) = Output \times \delta(Output) \quad (1)$$

$$W(G_y)\delta(G_y) + W(G_a)\delta(G_a) + D(G_a)\delta(G_a) + W(C_y)\delta(C_y) + W(C_a)\delta(C_a) + D(C_a)\delta(C_a) = B(G)(\delta(A) - \Delta C) + B(C)\delta(A) \quad (2)$$

Rearranging gives:

$$\Delta C \times B(G) = (\delta(A) - \delta(G_y))W(G_y) + (\delta(A) - \delta(G_a))(W(G_a) + D(G_a)) + (\delta(A) - \delta(C_y))W(C_y) + (\delta(A) - \delta(C_a))(W(C_a) + D(C_a)) \quad (3)$$

Where  $\delta(X)$  is the isotopic composition of reservoir X, W denotes weathering, D denotes degassing and B denotes burial.  $\Delta B$  and  $\Delta S$  are the fractionation effects for burial of carbon and sulphur respectively. This equation is mirrored for the sulphur cycle.

## APPENDIX 2: FULL MODEL DESCRIPTION

The full model equations are detailed below. Aside from the addition of rapid recycling and isotope mass balance, and the removal of the nutrient system, they follow exactly the model from Mills et al., (2014). The flux names from the manuscript are simplified here for convenience:

$$\begin{aligned} W(C_y) &= carbw_y, W(C_a) = carbw_a, W(G_y) = oxidw_y, W(G_a) = oxidw_a, \\ D(C) &= ccdeg, D(G) = ocdeg, B(G) = ocb, B(C) = mccb \\ W(GYP_y) &= gypw_y, W(GYP_a) = gypw_a, W(PYR_y) = pyrw_y, W(PYR_a) = pyrw_a, \\ D(GYP) &= gypdeg, D(PYR) = pyrdeg, B(GYP) = mgsb, B(PYR) = mpsb \end{aligned}$$

### Reservoir calculations:

Atmosphere/ocean carbon:

$$\frac{dA}{dt} = ccdeg + carbw_y + carbw_a + oxidw_y + oxidw_a + ocdeg$$

$$-mccb - ocb - sfw \quad (4)$$

102 Ocean sulphate:

$$\frac{dS}{dt} = pyrwy + pyrw_a + pyrdeg + gypwy + gypw_y + gypdeg$$

$$-mpsb - mgsb \quad (5)$$

$$104 \text{ Buried organic C (young): } \frac{dG_y}{dt} = ocb - oxidw_y - F_{Gya} \quad (6)$$

$$105 \text{ Buried organic C (ancient): } \frac{dG_a}{dt} = F_{Gya} - oxidw_a - ocdeg \quad (7)$$

$$106 \text{ Buried carbonate C (young): } \frac{dC_y}{dt} = mccb - carbw_y - F_{Cya} \quad (8)$$

$$107 \text{ Buried carbonate C (ancient): } \frac{dC_a}{dt} = F_{Cya} - carbw_a - ccdeg \quad (9)$$

$$108 \text{ Buried pyrite S (young): } \frac{dPYR_y}{dt} = mpsb - pyrw_y - F_{PYRya} \quad (10)$$

$$109 \text{ Buried pyrite S (ancient): } \frac{dPYR_a}{dt} = F_{PYRya} - pyrw_a - pyrdeg \quad (11)$$

$$110 \text{ Buried gypsum S (young): } \frac{dGYP_y}{dt} = mgsb - gypw_y - F_{GYPya} \quad (12)$$

$$111 \text{ Buried gypsum S (ancient): } \frac{dGYP_a}{dt} = F_{GYPya} - gypw_a - gypdeg \quad (13)$$

112 **Isotope reservoir calculations:**

113 Atmosphere/ocean carbon:

$$114 \frac{d(A \times \delta(A))}{dt} = ccdeg \times \delta(C_a) + carbw_y \times \delta(C_y) + carbw_a \times \delta(C_a) + oxidw_y \times \delta(G_y) +$$

$$115 oxidw_a \times \delta(G_a) + ocdeg \times \delta(G_a) - ocb \times (\delta(A) - \Delta C) - mccb \times \delta(A) - sfw \times \delta(A)$$

$$116 \quad (14)$$

117 Ocean sulphate:

$$\begin{aligned}
118 \quad & \frac{d(S \times \delta(S))}{dt} = gypdeg \times \delta(GYP_a) + gypw_y \times \delta(GYP_y) + gypw_a \times \delta(GYP_a) + pyr w_y \times \\
119 \quad & \delta(PYR_y) + pyr w_a \times \delta(PYR_a) + pyrdeg \times \delta(PYR_a) - mpsb \times (\delta(S) - \Delta S) - mgsb \times \\
120 \quad & \delta(S) \tag{15}
\end{aligned}$$

121 Buried organic C (young):

$$122 \quad \frac{d(G_y \times \delta(G_y))}{dt} = ocb \times (\delta(A) - \Delta C) - oxidw_y \times \delta(G_y) - F_{Gya} \times \delta(G_y) \tag{16}$$

123 Buried organic C (ancient):

$$124 \quad \frac{d(G_a \times \delta(G_a))}{dt} = F_{Gya} \times \delta(G_y) - oxidw_a \times \delta(G_a) - ocdeg \times \delta(G_a) \tag{17}$$

125 Buried carbonate C (young):

$$126 \quad \frac{d(C_y \times \delta(C_y))}{dt} = mccb \times \delta(A) - carbw_y \times \delta(C_y) - F_{Cya} \times \delta(C_y) \tag{18}$$

127 Buried carbonate C (ancient):

$$128 \quad \frac{d(C_a \times \delta(C_a))}{dt} = F_{Cya} \times \delta(C_y) - carbw_a \times \delta(C_a) - ccdeg \times \delta(C_a) \tag{19}$$

129 Buried pyrite S (young):

$$130 \quad \frac{d(PYR_y \times \delta(PYR_y))}{dt} = mpsb \times (\delta(S) - \Delta S) - pyr w_y \times \delta(PYR_y) - F_{PYRya} \times \delta(PYR_y) \tag{20}$$

131 Buried pyrite S (ancient):

$$132 \quad \frac{d(PYR_a \times \delta(PYR_a))}{dt} = F_{PYRya} \times \delta(PYR_y) - pyr w_a \times \delta(PYR_a) - pyrdeg \times \delta(PYR_a) \tag{21}$$

133 Buried gypsum S (young):

$$134 \quad \frac{d(GYP_y \times \delta(GYP_y))}{dt} = mgsb \times \delta(S) - gypw_y \times \delta(GYP_y) - F_{GYPya} \times \delta(GYP_y) \tag{22}$$

135 Buried gypsum S (ancient):

$$136 \quad \frac{d(GYP_a \times \delta(GYP_a))}{dt} = F_{GYPya} \times \delta(GYP_y) - gypw_a \times \delta(GYP_a) - gypdeg \times \delta(GYP_a) \tag{23}$$

137 **List of fluxes**

138 Temperature dependence of basalt weathering:

$$139 \quad f_{Tbas} = e^{0.061(T-T_0)} \{1 + 0.038(T - T_0)\}^{0.65} \quad (24)$$

140 Temperature dependence of granite weathering:

$$141 \quad f_{Tgran} = e^{0.072(T-T_0)} \{1 + 0.038(T - T_0)\}^{0.65} \quad (25)$$

142 Temperature dependence of carbonate weathering:

$$143 \quad g_T = 1 + 0.087(T - T_0) \quad (26)$$

$$144 \quad \text{Pre-plant silicate weathering:} \quad f_{preplant} = f_T \cdot \sqrt{RCO_2} \quad (27)$$

$$145 \quad \text{Plant-assisted silicate weathering:} \quad f_{plant} = f_T \cdot \left( \frac{2RCO_2}{1+RCO_2} \right)^{0.4} \quad (28)$$

$$146 \quad \text{Pre-plant carbonate weathering:} \quad g_{preplant} = g_T \cdot \sqrt{RCO_2} \quad (29)$$

$$147 \quad \text{Plant-assisted carbonate weathering:} \quad g_{plant} = g_T \cdot \left( \frac{2RCO_2}{1+RCO_2} \right)^{0.4} \quad (30)$$

148 Climate forcing for silicates:

$$149 \quad f_{CO2} = f_{preplant}(1 - \min(VEG \cdot W)) + f_{plant} \cdot \min(VEG \cdot W) \quad (31)$$

150  $f_{CO2gran}$  and  $f_{CO2bas}$  result from the  $f_{CO2}$  function with plant-weathering feedbacks using  $f_{Tgran}$   
151 and  $f_{Tbas}$  respectively.

152 Climate forcing for carbonates:

$$153 \quad g_{CO2} = g_{preplant}(1 - \min(VEG \cdot W)) + g_{plant} \cdot \min(VEG \cdot W) \quad (32)$$

$$154 \quad \text{Vegetation feedback: } VEG = 2 \cdot E \cdot \frac{(CO_2ppm-10)}{(183.6+CO_2ppm-10)} \cdot \left( 1 - \left( \frac{(T-T_0)}{T} \right)^2 \right) \cdot (1.5 -$$

$$155 \quad 0.5(RO_2)) \cdot \frac{k_{fire}}{(k_{fire}-1+\max(586.2O_2(atm)-122.102,0))} \quad (33)$$

$$156 \quad \text{Evolution of plants:} \quad pevol = (k_{preplant} + (1 - k_{preplant}) \cdot W \cdot VEG) \quad (34)$$

$$157 \quad \text{Basalt weathering:} \quad basw = \%bas_0 \cdot k_{silw} \cdot f_{CO2bas} \cdot PG \cdot pevol \cdot BA \quad (35)$$

158 Granite weathering:

$$159 \quad granw = (1 - \%bas_0) \cdot k_{silw} \cdot f_{CO2gran} \cdot PG \cdot U \cdot pevol \cdot GA \quad (36)$$

$$160 \quad \text{Silicate weathering:} \quad silw = basw + granw \quad (37)$$

$$161 \quad \text{Carbonate weathering (young):} \quad carbw_y = k_{carbw_y} \cdot g_{CO2} \cdot PG \cdot U \cdot pevol \cdot LAC_{rel} \quad (38)$$

$$162 \quad \text{Carbonate weathering (ancient):} \quad carbw_a = k_{carbw_a} \cdot g_{CO2} \cdot PG \cdot U \cdot pevol \cdot LAC_{rel} \quad (39)$$

$$163 \quad \text{Oxidative weathering (young):} \quad oxidw_y = k_{oxidw_y} \cdot U \cdot \sqrt{RO_2} \quad (40)$$

$$164 \quad \text{Oxidative weathering (ancient):} \quad oxidw_y = k_{oxidw_a} \cdot U \cdot \sqrt{RO_2} \quad (41)$$

$$165 \quad \text{Transfer from } C_y \text{ to } C_a: \quad F_{Gya} = carbw_a + ccdeg \quad (42)$$

$$166 \quad \text{Transfer from } G_y \text{ to } G_a: \quad F_{Gya} = oxidw_a + ocdeg \quad (43)$$

$$167 \quad \text{Marine carbonate carbon burial:} \quad mccb = silw + carbw \quad (44)$$

168 Seafloor weathering is revised to include direct temperature dependence as with terrestrial  
169 basalt weathering. This assumes a direct relationship between surface temperature change and  
170 seafloor temperatures.

$$171 \quad \text{Seafloor weathering:} \quad sfw = k_{sfw} \cdot D \cdot e^{0.061(T-T_0)} \quad (45)$$

172 In COPSE, sulphur degassing is assumed to have the same controls as sulphur weathering,  
173 therefore the degassing terms are accounted for by larger weathering terms:

$$174 \quad \text{Pyrite sulphur weathering (young):} \quad pyrw_y = k_{pyrw_y} \cdot U \cdot \frac{PYR_y}{PYR_{y0}} \sqrt{RO_2} \quad (46)$$

$$175 \quad \text{Pyrite sulphur weathering (ancient):} \quad pyrw_a = k_{pyrw_a} \cdot U \cdot \frac{PYR_a}{PYR_{a0}} \sqrt{RO_2} \quad (47)$$

$$176 \quad \text{Gypsum sulphur weathering (young):} \quad gypw = k_{gypw} \cdot U \cdot \frac{GYP_y}{GYP_{y0}} \cdot \frac{carbw}{carbw_0} \quad (48)$$

$$177 \quad \text{Gypsum sulphur weathering (ancient):} \quad gypw = k_{gypw} \cdot U \cdot \frac{GYP_a}{GYP_{a0}} \cdot \frac{carbw}{carbw_0} \quad (49)$$

178 Transfer from  $GYP_y$  to  $GYP_a$ :  $F_{GYPya} = gypw_a + gypdeg$  (50)

179 Transfer from  $PYR_y$  to  $PYR_a$ :  $F_{PYRya} = pyrw_a + pyrdeg$  (51)

180 Gypsum sulphur burial:  $mgsb = k_{mgsb} \cdot \frac{S}{S_0} \cdot \frac{CAL}{CAL_0}$  (52)

181 Organic carbon degassing:  $ocdeg = k_{ocdeg} \left( \frac{G}{G_0} \right) \cdot D$  (53)

182 Carbonate carbon degassing:  $ccdeg = k_{ccdeg} \left( \frac{C}{C_0} \right) \cdot D \cdot B$  (54)

183 Marine carbonate carbon burial:  $mccb = silw + carbw$  (55)

184

185 Total organic carbon burial:

186  $ocb = \frac{1}{\Delta C} \left( carbw_y (\delta(A) - \delta(C_y)) + carbw_a (\delta(A) - \delta(C_a)) + oxidw_y (\delta(A) - \right.$   
 187  $\left. \delta(G_y)) + oxidw_a (\delta(A) - \delta(G_a)) + ccdeg (\delta(A) - \delta(C_a)) + ocdeg (\delta(A) - \delta(G_a)) \right)$  (56)

188 Total pyrite sulphur burial:

189  $pyrb = \frac{1}{\Delta S} \left( gypw_y (\delta(S) - \delta(GYP_y)) + gypw_a (\delta(S) - \delta(GYP_a)) + pyrw_y (\delta(S) - \right.$   
 190  $\left. \delta(PYR_y)) + pyrw_a (\delta(S) - \delta(PYR_a)) + gypdeg (\delta(S) - \delta(GYP_a)) + pyrdeg (\delta(S) - \right.$   
 191  $\left. \delta(PYR_a)) \right)$  (57)

192 **Other calculations:**

193 Relative atmospheric  $O_2$ :  $RO_2 = \frac{\frac{o}{o_0}}{\frac{o}{o_0} + k_{O_2}}$  (58)

194 where  $k_{O_2} = 3.762$

195 Solar forcing: 
$$S = \frac{S_0}{1+0.38\left(\frac{t}{\tau}\right)} \quad (59)$$

196 where  $S_0 = 1368 \text{ W m}^{-2}$ ,  $\tau=4.55 \times 10^9$  years.

| 197 | Present day values:                  |                                                               | Source:             |
|-----|--------------------------------------|---------------------------------------------------------------|---------------------|
| 198 | Marine organic carbon burial:        | $k_{\text{moch}}=4.5 \times 10^{12} \text{ mol C yr}^{-1}$    | COPSE               |
| 199 | Pyrite sulphur burial:               | $k_{\text{mpsb}}=5.3 \times 10^{11} \text{ mol S yr}^{-1}$    | COPSE               |
| 200 | Gypsum sulphur burial:               | $k_{\text{mgsb}}=1 \times 10^{12} \text{ mol S yr}^{-1}$      | COPSE               |
| 201 | Silicate weathering:                 | $k_{\text{silw}}=4.9 \times 10^{12} \text{ mol C yr}^{-1}$    | for steady state    |
| 202 | Seafloor weathering:                 | $k_{\text{sfw}}=1.75 \times 10^{12} \text{ mol C yr}^{-1}$    | Mills et al. (2014) |
| 203 | Oxidative weathering (young):        | $k_{\text{oxidwy}}=7 \times 10^{12} \text{ mol C yr}^{-1}$    | COPSE               |
| 204 | Oxidative weathering (ancient):      | $k_{\text{oxidwa}}=7.75 \times 10^{11} \text{ mol C yr}^{-1}$ | COPSE               |
| 205 | Carbonate weathering (young):        | $k_{\text{carbwy}}=1.8 \times 10^{13} \text{ mol C yr}^{-1}$  | COPSE               |
| 206 | Carbonate weathering (ancient):      | $k_{\text{carbwy}}=2 \times 10^{12} \text{ mol C yr}^{-1}$    | COPSE               |
| 207 | Pyrite sulphur weathering (young):   | $k_{\text{pyrw}}=2.36 \times 10^{11} \text{ mol S yr}^{-1}$   | COPSE               |
| 208 | Pyrite sulphur weathering (ancient): | $k_{\text{pyrw}}=2.9 \times 10^{11} \text{ mol S yr}^{-1}$    | COPSE               |
| 209 | Gypsum sulphur weathering (young)    | $k_{\text{gypwy}}=7.5 \times 10^{11} \text{ mol S yr}^{-1}$   | COPSE               |
| 210 | Gypsum sulphur weathering (ancient)  | $k_{\text{gypwy}}=2.5 \times 10^{11} \text{ mol S yr}^{-1}$   | COPSE               |
| 211 | Organic carbon degassing:            | $k_{\text{ocdeg}}=1.25 \times 10^{12} \text{ mol C yr}^{-1}$  | COPSE               |
| 212 | Carbonate carbon degassing:          | $k_{\text{ccdeg}}=6.65 \times 10^{12} \text{ mol C yr}^{-1}$  | COPSE               |
| 213 | Atmosphere and ocean $\text{CO}_2$ : | $A_0=3.193 \times 10^{18} \text{ mol}$                        | COPSE               |
| 214 | Ocean sulphate:                      | $P_0=4 \times 10^{19} \text{ mol}$                            | COPSE               |

|     |                                                                                                              |                                                                      |       |
|-----|--------------------------------------------------------------------------------------------------------------|----------------------------------------------------------------------|-------|
| 215 | Atmosphere and ocean oxygen:                                                                                 | $O_0=3.7 \times 10^{19}$ mol                                         | COPSE |
| 216 | Buried organic carbon:                                                                                       | $G_0=1.25 \times 10^{21}$ mol                                        | COPSE |
| 217 | Buried carbonate carbon:                                                                                     | $C_0=6.6 \times 10^{21}$ mol                                         | COPSE |
| 218 | Buried pyrite sulphur:                                                                                       | $PYR_0=1.8 \times 10^{20}$ mol                                       | COPSE |
| 219 | Buried gypsum sulphur:                                                                                       | $GYP_0=2 \times 10^{20}$ mol                                         | COPSE |
| 220 | <b>Forcings:</b>                                                                                             | <b>Attributes:</b>                                                   |       |
| 221 | Solar forcing:                                                                                               | $S = \frac{S_0}{1+0.38\left(\frac{t}{\tau}\right)}$                  |       |
| 222 |                                                                                                              | where $S_0 = 1368 \text{ W m}^{-2}$ , $\tau=4.55 \times 10^9$ years. |       |
| 223 | Relative global CO <sub>2</sub> degassing:                                                                   | $D = 1$ for present day                                              |       |
| 224 | Relative uplift rate:                                                                                        | $U = 1$ for present day                                              |       |
| 225 | Evolution of land plants:                                                                                    | $E = 1$ for present day                                              |       |
| 226 | Weathering effect of plant evolution:                                                                        | $W = 1$ for present day                                              |       |
| 227 | Carbonate burial depth:                                                                                      | $B = 1$ for present day                                              |       |
| 228 | Relative basaltic area:                                                                                      | $BA = 1$ for present day                                             |       |
| 229 | Relative total land area:                                                                                    | $LA_{\text{rel}} = 1$ for present day                                |       |
| 230 | Relative carbonate land area:                                                                                | $LAC_{\text{rel}} = 1$ for present day                               |       |
| 231 | Relative granite area:                                                                                       | $GA = LA - LAC - BA_{\text{cont}}$                                   |       |
| 232 | where $BA_{\text{cont}}$ is the total basaltic area on continents (i.e. total basaltic area minus island arc |                                                                      |       |
| 233 | and ocean island contributions) and LA and LAC are the total land area and carbonate land                    |                                                                      |       |
| 234 | area respectively, calculated by scaling the relative areas to the present day areas.                        |                                                                      |       |
| 235 | Paleogeographical runoff effect:                                                                             | $PG = 1$ for present day                                             |       |

## Starting conditions

The model reservoir of ancient carbonates,  $C_a$ , is by far the largest store of carbon, therefore its assumed isotopic composition at the start of the model run will influence the relative carbon burial rates for this time. This parameter is set so that organic C burial rates and oxygen concentration return to present day values at the end of the run (0Ma). This requires  $\delta(C_{astart}) = 1.16$  for the GEOCARB  $\delta^{13}C$  input, and  $\delta(C_{astart}) = -0.56$  for the GTS2012 input.

## Model output

Figure DR2 shows IMB-COPSE model output for 3 combinations of input parameters:

- 1)  $\delta^{13}C$  and  $\delta^{34}S$  inputs follow GEOCARBSULF. Shown in green.
- 2)  $\delta^{13}C$  input follows GEOCARBSULF,  $\delta^{34}S$  inputs follow Algeo et al., (2015). Shown in orange.
- 3)  $\delta^{13}C$  input follows GTS2012 (Saltzman and Thomas, 2012),  $\delta^{34}S$  inputs follow Algeo et al., (2015). Shown in red.

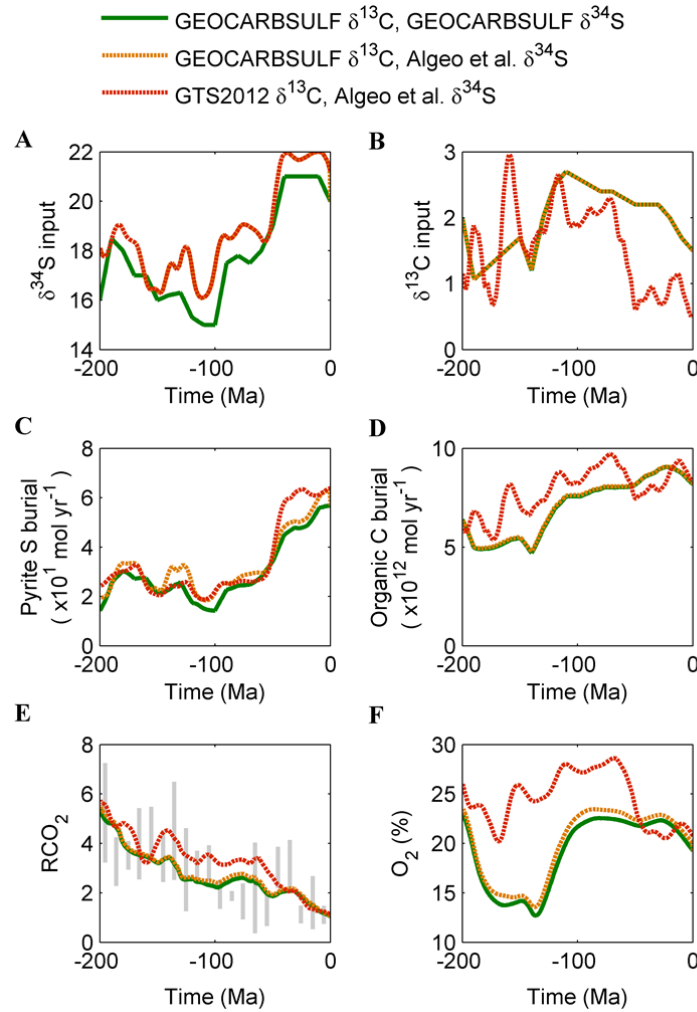

Figure DR2. IMB-COPSE model output for different isotope input scenarios. Relative atmospheric  $\text{CO}_2$  concentration plotted against compilation of Park and Royer (2011).

Under the GEOCARBSULF inputs, the IMB-COPSE model predicts very similar variations in atmospheric oxygen to the original GEOCARBSULF model (Berner, 2009; see manuscript). When  $\delta^{34}\text{S}$  input is altered to follow Algeo et al., (2015), oxygen variation is only slightly affected, owing to the minor alteration to the input (around one 5<sup>th</sup> of the range), and to the significantly smaller fluxes of oxygen associated with the sulphur system when

compared to carbon. When the  $\delta^{13}\text{C}$  input parameter is also altered, predicted oxygen concentration is significantly changed, and is higher over the model timeframe. This stems from the assumption that Mesozoic  $\delta^{13}\text{C}$  was higher than present, equating to greater organic carbon burial in this model variant.

### **APPENDIX 3: ADDITIONAL MODEL EXPERIMENTS**

#### **Sensitivity of $\text{O}_2$ predictions to input parameters other than carbonate $\delta^{13}\text{C}$**

In the manuscript we show extreme sensitivity of modelled oxygen predictions to carbonate  $\delta^{13}\text{C}$  inputs. In figure DR3 we test additional uncertainty by including error estimates for other model processes. The grey area shows the extent of the range of model predictions when run with  $\pm 1\sigma$  variation in carbonate  $\delta^{13}\text{C}$ , but also with variation between the minimum and maximum estimates for the rate of volcanic  $\text{CO}_2$  degassing and the global area of weatherable volcanic rocks. This mirrors the sensitivity window shown in Mills et al., (2014). The effects on atmospheric oxygen predictions are small when compared to the results under variation in carbonate  $\delta^{13}\text{C}$  alone (blue dotted lines). It has been shown (Royer et al., 2014) that multi-parameter error analysis on all GEOCARBSULF input parameters, despite minimal variation in the  $\delta^{13}\text{C}$  input, can give similar uncertainty ranges for model  $\text{O}_2$  predictions as are calculated here by varying only the  $\delta^{13}\text{C}$  input. The grey error window we show could therefore be extended using this method, but the best-guess predictions, which are the subject of this paper, would not be altered. Nevertheless it should be noted that it is possible for this model to predict a period of low  $\text{O}_2$  (<15%) during the Jurassic, but such prediction would rely on a fortuitous combination of parameter variations.

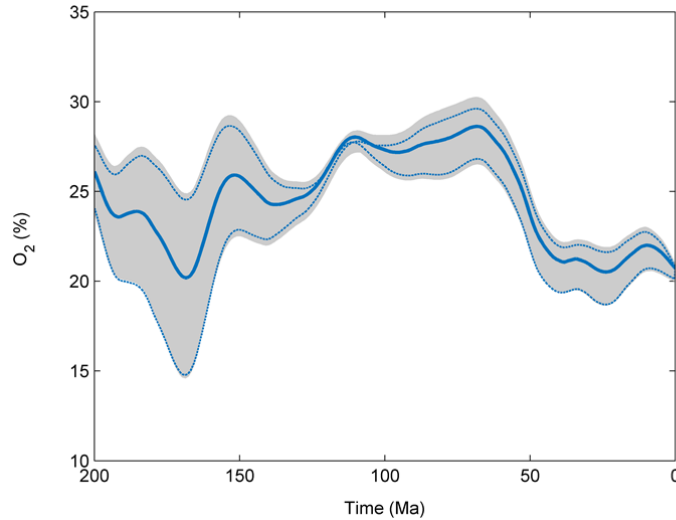

Figure DR3. Model error window (grey) when subject to max/min variation in inputs for carbonate  $\delta^{13}\text{C}$ , volcanic  $\text{CO}_2$  degassing rate and weatherable area of volcanic rocks. See Mills et al., (2014) for details of these processes. Compared to model error window under  $\pm 1\sigma$  in carbonate  $\delta^{13}\text{C}$  input (blue dashed lines).

### Model sensitivity to carbonate reservoir variations.

Our model assumes an increase in the degassing rate of carbonates at  $\sim 140\text{Ma}$ , aiming to represent the subduction of deep ocean carbonate deposits after the evolution of calcareous plankton (burial depth forcing  $B$  above, following from GEOCARB modelling). However, carbonate subduction may be more dependent on longer term basin dynamics and may therefore produce a destabilizing effect on the carbon cycle (Edmond and Huh, 2003). In figure DR4 we replace the  $B$  forcing with a new flux from the young carbonate reservoir to the atmosphere/ocean. This represents tectonic control of carbonate subduction and follows Edmond and Huh (2003; panel A). As discussed by these authors, this flux can have a considerable impact on model  $\text{CO}_2$  predictions. This follows from the idea that the modern day steady state does not include some significant past processes. The impact on our oxygen

predictions is however relatively small: the increase in carbon fluxes only represents around 10% of the total gross throughput, and therefore does not greatly alter the mass balance calculation for  $O_2$  (see manuscript).

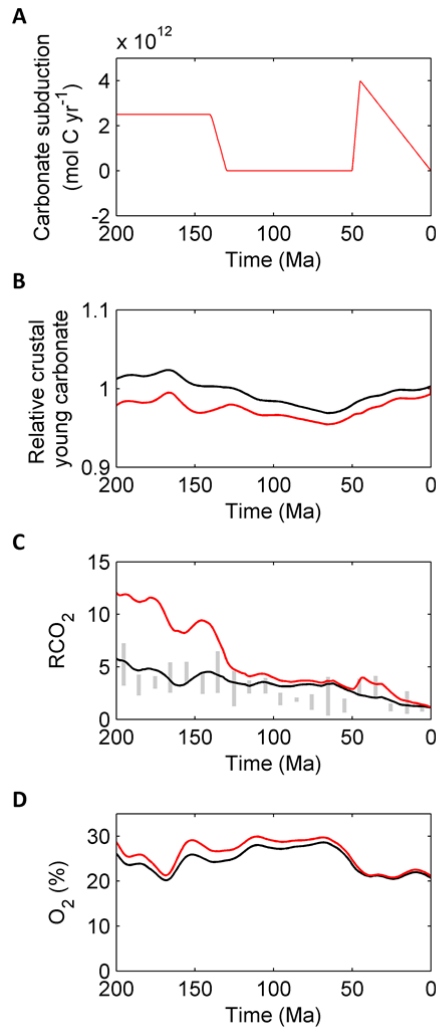

Figure DR4. Model configured with additional carbonate subduction flux from young carbonates to atmosphere/ocean (red). Compared to original model (black).

**Model sensitivity to pyrite burial constraints.**

The quantity  $f_{\text{pyr}}$  represents pyrite burial as a fraction of total sulphur burial. In GEOCARB and COPSE modelling  $f_{\text{pyr}}$  is around 0.3-0.4 at the present day. It has however

310 been suggested, based on direct estimation of the sulphate burial rate, that  $f_{\text{pyr}}$  may have been  
311 as high as 0.9 and stable at this fraction for the whole Phanerozoic (Halevy et al., 2012). To  
312 close the isotope mass balance under this constraint requires a fixed time-evolution of the  
313 isotopic composition of sulphate inputs (figure DR5, panel A), although this is not supported  
314 by available data on the composition of sulphur in coals (Canfield, 2013). In figure DR5 we  
315 run the model with an imposed  $\delta^{34}\text{S}$  of sulphate inputs, and an increased rate of pyrite burial  
316 at present day (Halevy et al., 2012). Variation in oxygen predictions is again small. This is  
317 because the rate of oxygen production from pyrite burial is still much smaller than via  
318 organic carbon burial (around 20%), and also because the higher and more stable rate of  
319 pyrite burial in the altered model acts to reduce the overall variation in oxygen production  
320 rates.

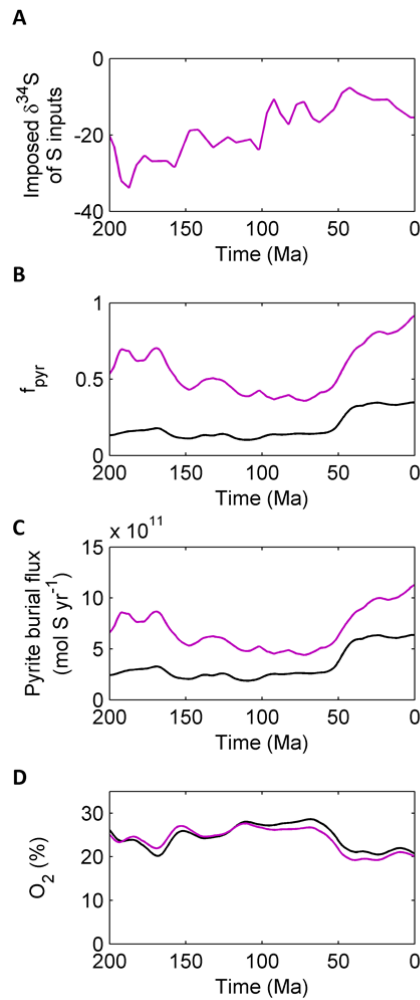

Figure DR5. Model configured with higher rate of pyrite burial and imposed  $\delta^{34}\text{S}$  value for sulphate inputs (purple). Compared to original model (black).

## ADDITIONAL REFERENCES

- Berner, R. A., 1991, A model for atmospheric  $\text{CO}_2$  over Phanerozoic time: American Journal of Science, v. 291, p. 339-376.
- Berner, R. A., 1994, Geocarb II: A revised model of atmospheric  $\text{CO}_2$  over Phanerozoic time: American Journal of Science, v. 294, p. 56-91.

- 330 Berner, R. A., and Kothavala, Z., 2001, Geocarb III: A revised model of atmospheric CO<sub>2</sub>  
331 over Phanerozoic time: American Journal of Science, v. 301, p. 182-204.
- 332 Canfield, D. E., 2013, Sulfur isotopes in coal constrain the evolution of the Phanerozoic  
333 sulfur cycle. PNAS v. 110, p. 8443-8446.
- 334 Edmond, J. M. and Huh, Y., 2003, Non-steady state carbonate recycling and implications for  
335 the evolution of atmospheric pCO<sub>2</sub>. EPSL v. 216, p. 125-139.
- 336 Halevy I, Peters S. E. and Fischer W. W., 2012, Sulfate burial constraints on the Phanerozoic  
337 sulfur cycle. Science v. 337, p. 331–334.
- 338 Park, J., and Royer, D. L., 2011, Geologic constraints on the glacial amplification of  
339 Phanerozoic climate sensitivity: American Journal of Science, v. 311, p. 1-26.

Table DR1

| Time (Ma) | O2 (%)   |
|-----------|----------|
| 0         | 20.7203  |
| 1         | 20.90787 |
| 2         | 21.10574 |
| 3         | 21.29921 |
| 4         | 21.47945 |
| 5         | 21.63717 |
| 6         | 21.76217 |
| 7         | 21.86486 |
| 8         | 21.94267 |
| 9         | 21.991   |
| 10        | 22.00081 |
| 11        | 21.9663  |
| 12        | 21.89003 |
| 13        | 21.77882 |
| 14        | 21.64491 |
| 15        | 21.51127 |
| 16        | 21.37791 |
| 17        | 21.23873 |
| 18        | 21.08635 |
| 19        | 20.92225 |
| 20        | 20.77339 |
| 21        | 20.65584 |
| 22        | 20.57248 |
| 23        | 20.53019 |
| 24        | 20.51837 |
| 25        | 20.53857 |
| 26        | 20.5876  |
| 27        | 20.66192 |
| 28        | 20.75761 |
| 29        | 20.87008 |
| 30        | 20.97992 |
| 31        | 21.07253 |
| 32        | 21.13904 |
| 33        | 21.1932  |
| 34        | 21.24337 |
| 35        | 21.21574 |
| 36        | 21.17132 |
| 37        | 21.13311 |
| 38        | 21.07065 |
| 39        | 21.08161 |
| 40        | 21.15327 |
| 41        | 21.22717 |
| 42        | 21.34263 |
| 43        | 21.51468 |
| 44        | 21.71011 |
| 45        | 21.92514 |
| 46        | 22.17332 |
| 47        | 22.45822 |
| 48        | 22.79785 |
| 49        | 23.21467 |
| 50        | 23.69693 |
| 51        | 24.21096 |
| 52        | 24.71846 |
| 53        | 25.17477 |

|     |          |
|-----|----------|
| 54  | 25.57653 |
| 55  | 25.94122 |
| 56  | 26.28865 |
| 57  | 26.62366 |
| 58  | 26.93158 |
| 59  | 27.19963 |
| 60  | 27.43125 |
| 61  | 27.62742 |
| 62  | 27.81581 |
| 63  | 28.01337 |
| 64  | 28.20434 |
| 65  | 28.38152 |
| 66  | 28.5151  |
| 67  | 28.58899 |
| 68  | 28.62058 |
| 69  | 28.61372 |
| 70  | 28.57787 |
| 71  | 28.52064 |
| 72  | 28.44578 |
| 73  | 28.36056 |
| 74  | 28.27406 |
| 75  | 28.18909 |
| 76  | 28.10798 |
| 77  | 28.03518 |
| 78  | 27.97244 |
| 79  | 27.91927 |
| 80  | 27.87161 |
| 81  | 27.82921 |
| 82  | 27.79203 |
| 83  | 27.76068 |
| 84  | 27.73364 |
| 85  | 27.70503 |
| 86  | 27.67008 |
| 87  | 27.62493 |
| 88  | 27.56844 |
| 89  | 27.49885 |
| 90  | 27.41725 |
| 91  | 27.33634 |
| 92  | 27.27568 |
| 93  | 27.23141 |
| 94  | 27.19957 |
| 95  | 27.18076 |
| 96  | 27.1764  |
| 97  | 27.18818 |
| 98  | 27.21245 |
| 99  | 27.26183 |
| 100 | 27.31913 |
| 101 | 27.37768 |
| 102 | 27.43131 |
| 103 | 27.48736 |
| 104 | 27.55737 |
| 105 | 27.64465 |
| 106 | 27.74074 |
| 107 | 27.84057 |
| 108 | 27.93398 |

|     |          |
|-----|----------|
| 109 | 28.00096 |
| 110 | 28.03066 |
| 111 | 28.01916 |
| 112 | 27.96382 |
| 113 | 27.86179 |
| 114 | 27.7136  |
| 115 | 27.52366 |
| 116 | 27.29644 |
| 117 | 27.03823 |
| 118 | 26.75404 |
| 119 | 26.46771 |
| 120 | 26.1865  |
| 121 | 25.91493 |
| 122 | 25.65914 |
| 123 | 25.42765 |
| 124 | 25.22901 |
| 125 | 25.06348 |
| 126 | 24.91935 |
| 127 | 24.8013  |
| 128 | 24.71552 |
| 129 | 24.65866 |
| 130 | 24.6121  |
| 131 | 24.55371 |
| 132 | 24.48669 |
| 133 | 24.42469 |
| 134 | 24.36716 |
| 135 | 24.31882 |
| 136 | 24.28727 |
| 137 | 24.2729  |
| 138 | 24.27183 |
| 139 | 24.29023 |
| 140 | 24.34646 |
| 141 | 24.45507 |
| 142 | 24.60671 |
| 143 | 24.77658 |
| 144 | 24.94143 |
| 145 | 25.10279 |
| 146 | 25.26483 |
| 147 | 25.42797 |
| 148 | 25.58519 |
| 149 | 25.72532 |
| 150 | 25.83525 |
| 151 | 25.89968 |
| 152 | 25.91018 |
| 153 | 25.86315 |
| 154 | 25.75403 |
| 155 | 25.57453 |
| 156 | 25.31393 |
| 157 | 24.96454 |
| 158 | 24.53729 |
| 159 | 24.05196 |
| 160 | 23.52542 |
| 161 | 22.97639 |
| 162 | 22.41143 |
| 163 | 21.86963 |

|     |          |
|-----|----------|
| 164 | 21.35323 |
| 165 | 20.8912  |
| 166 | 20.53184 |
| 167 | 20.30169 |
| 168 | 20.19866 |
| 169 | 20.20379 |
| 170 | 20.31175 |
| 171 | 20.50601 |
| 172 | 20.76394 |
| 173 | 21.06746 |
| 174 | 21.40152 |
| 175 | 21.73367 |
| 176 | 22.04475 |
| 177 | 22.33281 |
| 178 | 22.58603 |
| 179 | 22.82386 |
| 180 | 23.07903 |
| 181 | 23.34865 |
| 182 | 23.58118 |
| 183 | 23.74602 |
| 184 | 23.84306 |
| 185 | 23.88353 |
| 186 | 23.8813  |
| 187 | 23.84355 |
| 188 | 23.79601 |
| 189 | 23.73907 |
| 190 | 23.66712 |
| 191 | 23.5984  |
| 192 | 23.58279 |
| 193 | 23.65363 |
| 194 | 23.81065 |
| 195 | 24.05719 |
| 196 | 24.39755 |
| 197 | 24.8072  |
| 198 | 25.25489 |
| 199 | 25.69296 |
| 200 | 26.10529 |
